# Effects of Naltrexone on Pain Sensitivity and Mood in Fibromyalgia: No Evidence for Endogenous Opioid Pathophysiology

Jarred W. Younger<sup>1\*</sup>, Alex J. Zautra<sup>2</sup>, Eric T. Cummins<sup>3</sup>

**1** Department of Anesthesia, Stanford University School of Medicine, Palo Alto, California, United States of America, **2** Department of Psychology, Arizona State University, Tempe, Arizona, United States of America, **3** College of Medicine, University of Arizona, Tucson, Arizona, United States of America

## Abstract

The pathophysiological mechanisms underlying fibromyalgia are still unknown, although some evidence points to endogenous opioid dysfunction. We examined how endogenous opioid antagonism affects pain and mood for women with and without fibromyalgia. Ten women with fibromyalgia and ten age- and gender-matched, healthy controls each attended two laboratory sessions. Each participant received naltrexone (50mg) at one session, and placebo at the other session, in a randomized and double-blind fashion. Participants were tested for changes in sensitivity to heat, cold, and mechanical pain. Additionally, we collected measures of mood and opioid withdrawal symptoms during the laboratory sessions and at home the night following each session. At baseline, the fibromyalgia group exhibited more somatic complaints, greater sensory sensitivity, more opioid withdrawal somatic symptoms, and lower mechanical and cold pain-tolerance than did the healthy control group. Neither group experienced changes in pain sensitivity due to naltrexone administration. Naltrexone did not differentially affect self-reported withdrawal symptoms, or mood, in the fibromyalgia and control groups. Consistent with prior research, there was no evidence found for abnormal endogenous opioid activity in women with fibromyalgia.

**Citation:** Younger JW, Zautra AJ, Cummins ET (2009) Effects of Naltrexone on Pain Sensitivity and Mood in Fibromyalgia: No Evidence for Endogenous Opioid Pathophysiology. PLoS ONE 4(4): e5180. doi:10.1371/journal.pone.0005180

**Editor:** William Taylor, University of Otago, New Zealand

**Received:** January 29, 2009; **Accepted:** March 16, 2009; **Published:** April 13, 2009

**Copyright:** © 2009 Younger et al. This is an open-access article distributed under the terms of the Creative Commons Attribution License, which permits unrestricted use, distribution, and reproduction in any medium, provided the original author and source are credited.

**Funding:** This research was supported, in part, by a Postdoctoral Fellowship Grant from the Arthritis Foundation ([www.arthritis.org](http://www.arthritis.org)) to the first author, and a grant from the National Institute on Arthritis, Musculoskeletal, and Skin Diseases R01 AR 04168 (Alex J Zautra, PI). The funders had no role in study design, data collection and analysis, decision to publish, or preparation of the manuscript.

**Competing Interests:** The authors have declared that no competing interests exist.

\* E-mail: Jarred.Younger@stanford.edu

## Introduction

Fibromyalgia is a chronic and debilitating condition, characterized primarily by diffuse musculoskeletal pain, mechanical allodynia, and hyperesthesia [1]. Other symptoms—including sleep disturbance, fatigue, anxiety, depression, and cognitive impairment—further contribute to its severity [2,3]. Fibromyalgia affects approximately 5% of women [4] and 1.6% of men [5] in the general U.S. population, many of whom still need effective treatment options [6]. The condition significantly impacts the quality of life for affected individuals [7] and imposes a large economic burden on society [8].

Recent studies of fibromyalgia pathophysiology point to central nervous system dysregulations [9]. One central nervous system target of investigation has been endogenous pain modulators [10,11] such as opioid-peptides [12]. We focused on beta-endorphin, which is an important mediator of analgesia [13]. Previous studies that contrasted peptide concentrations in fibromyalgia and control groups found no differences in cerebrospinal fluid [14] or blood plasma [15,16]. However, one study identified lower concentrations of beta-endorphins in the peripheral blood mononuclear cells of fibromyalgia patients [17]. A recent study also found decreased mu-opioid receptor availability in the brains of fibromyalgia patients [18]. Despite the indications of altered mu-opioid systems, three studies employing an experimental design and the (predominantly *mu*-)

opioid receptor antagonist naloxone failed to find any significant effect in fibromyalgia. Two of those studies found that naloxone did not affect pain sensitivity [19,20], and the third concluded that naloxone's effects are similar to those of a placebo [21].

To help address the conflicting information in the literature regarding endogenous opioid peptide involvement in fibromyalgia pathophysiology, we conducted this study on the effects of opioid antagonism in fibromyalgia pain and mood symptoms. We examined two *competing* hypotheses of how groups might differ in their responses to naltrexone. In Hypothesis 1, we predicted that women with fibromyalgia would be less affected by naltrexone administration than healthy controls (as represented by smaller increases of pain sensitivity and negative mood under naltrexone). Hypothesis 1 corresponds with the view that women with fibromyalgia have deficient endogenous pain inhibition. In the competing Hypothesis 2, we predicted that women with fibromyalgia would show exaggerated increased pain sensitivity and negative mood when given naltrexone, as compared to healthy controls. Hypothesis 2 represents the view that although opioid-based pain systems are maximally engaged in fibromyalgia, they insufficiently attenuate pain [22].

## Methods

### Study overview

In our study, women with and without a diagnosis of fibromyalgia attended two laboratory sessions, which were held

on separate days. Participants received the opioid antagonist naltrexone in one session, and placebo in the other. Drug administration was randomized and double-blinded. In each laboratory session, tests of pain sensitivity were administered, as well as measures of mood and opioid withdrawal. We extended others' experimental drug methodology [19,21] in a few important ways: 1) Both physical and psychological manifestations of fibromyalgia were measured. 2) The more potent opioid receptor antagonist naltrexone was used instead of naloxone. 3) Symptoms directly associated with opioid withdrawal were recorded. 4) Multiple pain modalities were used, including heat, cold and mechanical. 5) Home measurements were collected on some variables the night following each laboratory session.

## Participants

Participants were 10 women with fibromyalgia and 10 healthy controls matched for gender, age, and income, whose average age was 55 years ( $SD = 7.7$ ). Most of the participants were Caucasian (85%); two were Hispanic, and one was African-American. The average daily pain level for women with fibromyalgia was 6.1 on a 10-point scale (standard deviation of 2.4), a score that indicates moderately-high disease severity. Subjects were recruited via flyers or newspaper announcements in the greater metropolitan area of Phoenix, Arizona. Inclusion criteria included: 1) 18 or more years of age, 2) ability to give informed consent, and for the fibromyalgia group, 3) a physician's diagnosis of fibromyalgia. Exclusion criteria were: 1) current or past use of opioid medications and 2) pregnancy, or plans to become pregnant. All participants completed an evaluation for fibromyalgia on their first study visit, to confirm the physician diagnosis. Participants were fully informed of all study procedures and the risks involved, and all procedures were approved by the Institutional Review Board at Arizona State University. Written consent was obtained at the first laboratory visit.

In the fibromyalgia group, two women were taking prescription medications for pain (celecoxib, cyclobenzaprine, and carisoprodol), two were taking antidepressant or anxiolytic drugs with potential analgesic effects (trazadone and sertraline), and two were taking sleep-aid medications as needed (eszopiclone and zolpidem). One woman in the control group was taking an antidepressant (paroxetine). Participants were allowed to continue their medication throughout their participation in the study.

## Measures

**Baseline descriptive measures.** To determine baseline differences between the two groups, three measures were completed before any capsules were administered: fibromyalgia severity, general somatic complaints, and sensitivity to sensory stimulation. In both groups, we administered the 10-item Fibromyalgia Impact Questionnaire (FIQ; [23]) that measures severity of fibromyalgia. The FIQ is a widely used scale with good reliability and validity [24]. General somatic complaints were measured with the Somatization and Emotional Contribution Scale (SECS). The SECS is an author-generated, original somatic symptom checklist of 42 commonly experienced physical symptoms such as headache, muscle tension, and dizziness. SECS exhibits good internal consistency ( $\alpha = 0.93$ ) and construct validity [25] with the Somatization sub-scale of the Symptom Checklist-90R [26]. Sensitivity to sensory stimulation was assessed with the Sensory Hypersensitivity Scale (SHS; [27]). The SHS is a 25-item scale that can assess general sensitivity (internal reliability of  $\alpha = 0.80$ ) or modality-specific sensitivity (taste, light, sound, smell, pain, heat, cold, texture, and allergies). For the present analyses, we examined only the general sensitivity scores.

**Naltrexone outcome measures.** Drug response was assessed via three quantitative sensory tests of pain. The three pain tests were: 1) heat pain threshold and tolerance, 2) cold pain threshold and tolerance, and 3) mechanical pain threshold. To measure heat pain threshold and tolerance, a thermode was placed on the thenar eminence of the hand and heated from a baseline temperature of 32°C at a rate of 0.5°C/sec (maximum 50°C). Participants indicated via pressing a button when the temperature first became painful (threshold) and when the heat was no longer bearable (tolerance), at which point the thermode immediately cooled. Cold pain threshold and tolerance were measured following a similar protocol to heat. The thermode was placed on the thenar eminence of the opposite hand and cooled down from 32°C at a rate of 0.5°C (minimum 0°C). Participants indicated both pain threshold and tolerance levels. Mechanical pain sensitivity was measured using the 18 sites defined by the American College of Rheumatology [28]. Pressure was applied to the sites using a Fischer dolorimeter (Pain Diagnostics, Great Neck, NY) and 1 cm<sup>2</sup> rubber disk, at a rate of 1 kg/cm<sup>2</sup>/s, until the participant indicated pain. Pain threshold was recorded in kg/cm<sup>2</sup>, and all points were averaged to yield a total score of mechanical pain threshold. Some studies have found mechanical stimulation to be superior to thermal stimulation in predicting clinical pain [29,30].

In addition to the pain tests, participants also completed two self-reported questionnaires which examined opioid withdrawal symptoms, positive mood, and negative mood. Withdrawal symptoms were assessed with the Subjective Opiate Withdrawal Scale (SOWS; [31]). The scale includes withdrawal symptoms such as tremors, nausea, and perspiration. In our sample, Cronbach's  $\alpha = 0.87$ . Scores of positive and negative mood were obtained using the Positive and Negative Affect Schedule (PANAS); a widely used scale with strong psychometric properties [32,33]. This twenty-item scale yields separate, largely uncorrelated scores for positive (e.g., "excited," "strong," "interested") and negative (e.g., "nervous," "irritable," "upset") affect.

## Materials and Equipment

The study drug was naltrexone, approved by the U.S. Food and Drug Administration for treating narcotic dependency [34]. Naltrexone is an opioid-receptor antagonist with particular affinity for  $\mu$ -opioid receptors [35]. It is orally absorbed, reaches peak plasma levels in approximately one hour, and has a half-life of about 4 hours [36]. The drug is a competitive antagonist, preventing active opioid molecules from docking at receptor sites. The major biologically active metabolite is 6- $\beta$ -naltrexol, which has a half-life of from 12 to 18 hours [37]. In healthy volunteers, naltrexone is not associated with any significant adverse events [38,39]. Naltrexone has been employed successfully in pain studies as an alternative to intravenously-administered naloxone [40].

Naltrexone and placebo capsules were compounded by the Campus Health Service Pharmacy at Arizona State University. Opaque gelatin capsules were filled with 50mg of naltrexone+190mg corn starch filler, or 240mg corn starch filler for placebo. Weights were determined on an Acculab VIR Electronic Balance with readability to 1mg and precision rated at 2mg. Capsules were placed in prescription vials, labeled "A" and "B," with the identity of each vial's contents known only to the pharmacy manager. All study personnel were blinded to the contents of capsules. The identities of the capsules were revealed by the pharmacy manager at the conclusion of the study.

Hot and cold stimuli were presented with a Medoc TSA-II (Medoc Advanced Medical Systems; Durham, NC) and Peltier-type, 30×30mm thermode. The TSA-II allows for rapid heating

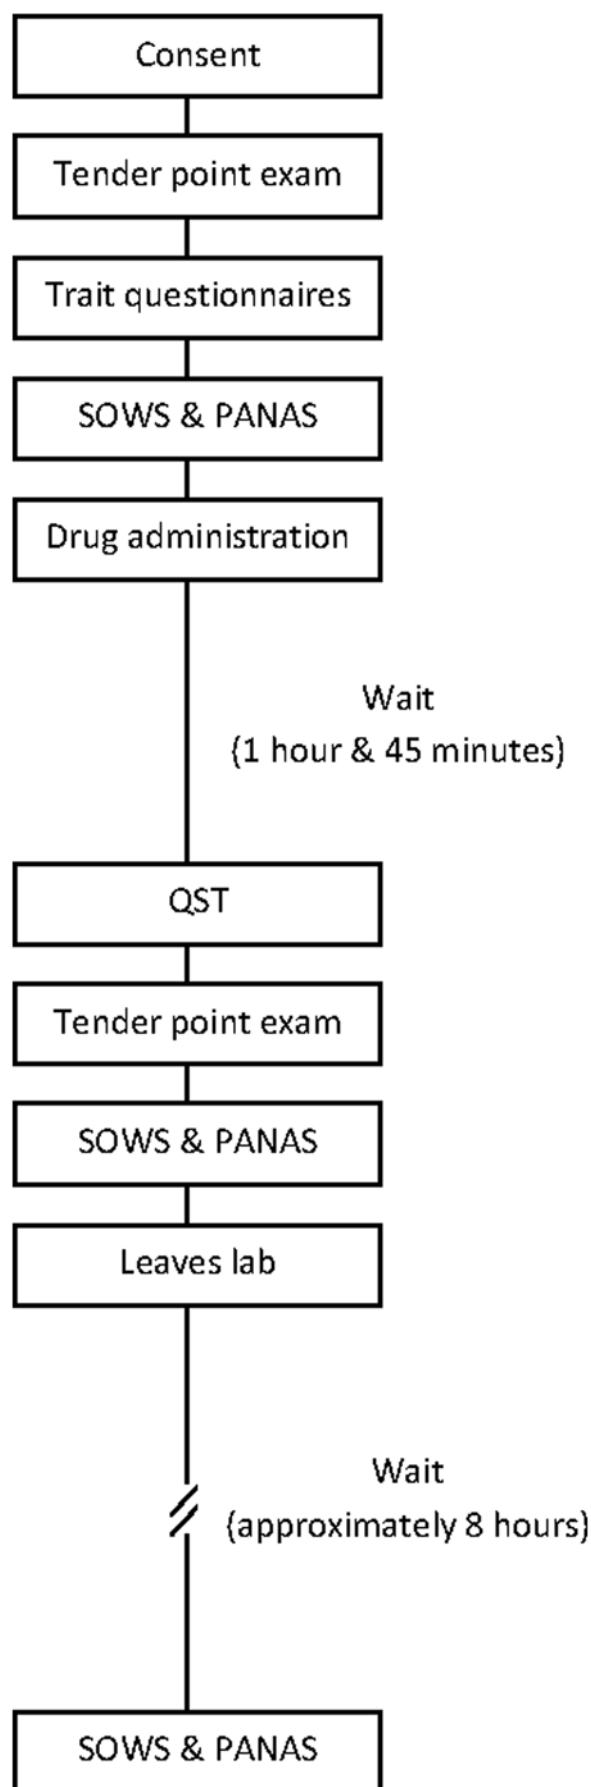

**Figure 1. Flow diagram of study procedures.** Study procedures conducted on each participant, once with naltrexone, and once with placebo. SOWS = Subjective Opioid Withdrawal Scale; PANAS = Positive and Negative Affect Schedule; QST = Quantitative Sensory Testing. doi:10.1371/journal.pone.0005180.g001

and cooling with a continuous contact surface. A two-button peripheral device allowed participants to indicate when threshold or tolerance levels had been reached.

### Procedures

All procedures were carried out at the Community Health Services Clinic at ASU by research personnel blinded to the gelcaps' contents. Figure 1 shows the order of study procedures. Upon arrival and consenting, participants completed the baseline descriptive scales (visit #1 only), the mechanical pain test, and the SOWS and PANAS. Naltrexone or placebo was then orally administered by a research assistant, who then started a timer to run for one hour and 45 minutes. Drug randomization was performed using a computerized, random assignment generator. The delay before primary assessments allowed sufficient absorption of the drug. During the interim period, participants were trained on the thermal stimulator, and they underwent practice versions of all the tests. For the remainder of the time, participants were kept on the premises and allowed to read.

After the waiting period, participants underwent the three quantitative sensory tests for pain: heat pain threshold and tolerance, cold pain threshold and tolerance, and a second mechanical threshold. Each participant then completed the self-reported PANAS and SOWS, received \$50.00, and was sent home with the instructions to complete an additional PANAS and SOWS, 7–8 hours after leaving the lab.

### Statistical analysis

We used SPSS version 17 to conduct all hypotheses tests. To compare fibromyalgia and control groups on the baseline measures, we used simple between-group (independent) *t*-tests. For all other tests (heat pain, cold pain, mechanical pain, withdrawal symptoms, and mood), we used linear mixed models. Subject ID was included as a random effect, and an unstructured covariance type was used for all analyses. Group (fibromyalgia versus control) and drug (naltrexone versus placebo) were included as fixed effects. For measures taken at multiple times throughout the day, time was included as an additional fixed effect.

### Results

Two individuals with a physician diagnosis of fibromyalgia did not meet the American College of Rheumatology [28] criteria for mechanical sensitivity, and were excluded from all analyses. The remaining 8 fibromyalgia participants all had an average daily pain level of at least 5 (on a 10-point scale). All fibromyalgia participants met widespread pain conditions (pain above and below waist, on both sides of the body, and in the axial skeletal region). No individuals in the control group met criteria for fibromyalgia. Independent sample *t*-tests revealed that the fibromyalgia group had higher FIQ scores than healthy controls (47.3 versus 10.5;  $t(16) = 7.6$ ,  $p < .001$ ), as well as more positive tender points (14.9 versus 1.1;  $t(16) = 11.1$ ,  $p < .001$ ), more general somatic complaints (1.5 versus 0.7,  $t(16) = 3.4$ ,  $p = .004$ ) and greater sensory sensitivity (3.3 versus 2.4;  $t(16) = 4.2$ ,  $p = .001$ ).

The effects of drug (naltrexone versus placebo) and group (fibromyalgia versus control) were tested on the three quantitative sensory tasks (see Table 1 for all means and standard deviations).

Fibromyalgia patients had lower heat pain thresholds than controls ( $F(1,16) = 7.31$ ,  $p = 0.016$ ), marginally lower heat pain tolerance ( $F(1,16) = 4.2$ ,  $p = 0.057$ ), more sensitivity to cold pain onset ( $F(1,16) = 9.2$ ,  $p = 0.008$ ), and less tolerance for cold pain ( $F(1,16) = 8.5$ ,  $p = 0.010$ ). There were no main effects for drug, nor any drug  $\times$  group interactions for heat or cold pain tests. We then tested the effects of naltrexone on mechanical pain sensitivity. Fibromyalgia patients had significantly lower mechanical pain thresholds than controls ( $F(1,16) = 187.04$ ,  $p < .0005$ ). A significant effect for drug emerged, with both groups showing increased thresholds (i.e., decreased pain sensitivity) during the naltrexone trial ( $F(1,16) = 5.48$ ,  $p = .032$ ). However, there were no significant interactions with group; fibromyalgia and control individuals reacted similarly to the drug administration.

The effects of drug, group, and time (before capsule, 2 hours after capsule, and 8 hours after capsule) were tested on the following variables: opioid withdrawal symptoms, positive mood, and negative mood. For *opioid withdrawal symptoms* (Figure 2), a significant group effect was revealed ( $F(1,16) = 24.4$ ,  $p < 0.0005$ ), with fibromyalgia patients reporting a significantly greater number of withdrawal-type symptoms. There was also a significant effect for time ( $F(1,16) = 6.7$ ,  $p = 0.008$ ), with symptoms increasing at the final measurement period (approximately 8 hours after drug administration). However, the drug  $\times$  time interaction failed to reach significance ( $F(1,16) = 2.5$ ,  $p = 0.116$ ). Furthermore, there was no interaction between group and drug; patients and controls reacted similarly to the naltrexone administration. For *positive mood*, there was a significant drop over time ( $F(1,16) = 17.58$ ,  $p < .0005$ ). No other significant effects emerged. For *negative mood*, there were no significant effects for group, drug, time, nor any interactions.

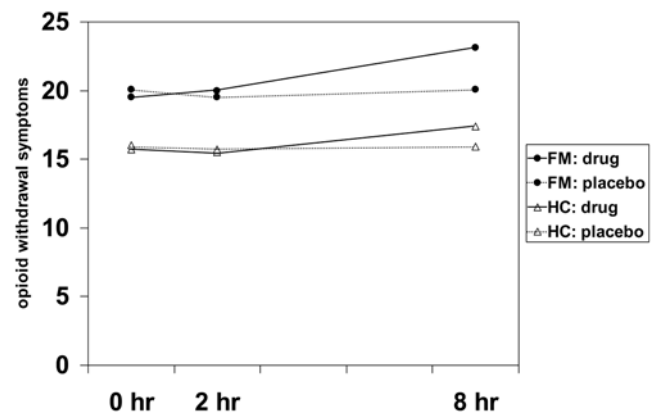

**Figure 2. Effects of naltrexone on self-reported opioid withdrawal symptoms.** Self-reported opioid withdrawal symptoms at 0 hours, 2 hours, and 8 hours (home measurement) after drug and placebo administration in Fibromyalgia patients (FM) and healthy controls (HC).

doi:10.1371/journal.pone.0005180.g002

## Discussion

In this study, we investigated the role of endogenous opioid peptides in fibromyalgia pain sensitivity. Fibromyalgia participants and age- and gender-matched controls showed similar responses to naltrexone, a potent opioid antagonist. We found no evidence of opioid dysregulation in fibromyalgia.

### Baseline comparison between fibromyalgia and healthy control groups

Many studies have identified elevated sensory, somatic and psychological symptoms in those with fibromyalgia; greater sensitivity to heat, cold, and mechanical pain [10], greater windup pain [21], greater incidence of affective disorders [41], general somatic complaints [42], cognitive impairment [43] and reproductive and sleep issues [44]. Fibromyalgia often overlaps with irritable bowel, chronic fatigue [45], and multiple chemical sensitivity syndromes [46]. Consistent with several previously reported group differences, we identified several baseline group differences. In addition to a self-reported higher sensitivity to a range of stimuli, and a greater number of somatic complaints than controls, fibromyalgia patients also had higher sensitivity to heat, cold, and mechanical pain. The wide variety of stimuli to which fibromyalgia individuals are sensitive suggests that a central nervous system amplification of signals may underlie fibromyalgia symptomatology [47,48].

### Effects of naltrexone

Neither experimental hypothesis was supported by the results, as both the fibromyalgia and control groups responded similarly to naltrexone administration. Pain threshold and tolerance were not affected by opioid antagonism in either group. Overall, our findings agree with those from similar past experiments—fibromyalgia pain does not appear to be related to beta-endorphin dysregulation [19–21]. Interestingly, both groups experienced significantly *lower* mechanical pain sensitivity on the naltrexone-administration visit, contrasted with the placebo visit. Again, there was no divergence in response between fibromyalgia and control groups, further suggesting that the *mu*-opioid system is not a site of dysregulation.

Both groups exhibited increased opioid withdrawal symptoms over time. While Figure 2 suggests that this effect was most

**Table 1. Drug and placebo means (SD) for all repeated-measures tests in Fibromyalgia and healthy controls.**

|                             | Fibromyalgia |            | Healthy Control |            |
|-----------------------------|--------------|------------|-----------------|------------|
|                             | Drug         | Placebo    | Drug            | Placebo    |
| Heat threshold(°C)          | 41.4 (2.5)   | 41.6 (4.2) | 44.2 (1.8)      | 44.3 (1.7) |
| Heat tolerance(°C)          | 44.8 (2.1)   | 45.2 (2.3) | 46.5 (1.7)      | 46.7 (1.2) |
| Cold threshold (°C)         | 17.1 (5.7)   | 16.2 (7.3) | 8.8 (6.6)       | 8.6 (4.6)  |
| Cold tolerance(°C)          | 11.0 (5.4)   | 10.3 (6.8) | 4.1 (4.2)       | 3.7 (4.3)  |
| Pressure threshold (kg/cm2) |              |            |                 |            |
| Pre drug                    | 5.6 (0.9)    | 6.4 (1.1)  | 9.7 (0.3)       | 9.9 (0.2)  |
| Post drug                   | 5.7 (1.0)    | 6.1 (1.0)  | 9.7 (0.3)       | 9.8 (0.3)  |
| Opioid withdrawal           |              |            |                 |            |
| Pre drug                    | 19.5 (2.7)   | 20.1 (4.0) | 15.7 (1.1)      | 16.0 (1.1) |
| Post drug                   | 20.0 (3.7)   | 19.5 (3.8) | 15.5 (1.1)      | 15.7 (0.8) |
| Home                        | 23.1 (5.1)   | 20.1 (3.6) | 17.4 (2.9)      | 15.9 (1.2) |
| Positive mood               |              |            |                 |            |
| Pre drug                    | 2.4 (0.9)    | 2.8 (0.9)  | 2.6 (0.7)       | 2.5 (0.7)  |
| Post drug                   | 2.2 (1.0)    | 2.3 (1.1)  | 2.2 (0.7)       | 2.4 (0.7)  |
| Home                        | 2.2 (1.0)    | 1.8 (0.8)  | 1.9 (0.6)       | 1.8 (0.6)  |
| Negative mood               |              |            |                 |            |
| Pre drug                    | 1.3 (0.5)    | 1.2 (0.6)  | 1.0 (0.1)       | 1.0 (0.1)  |
| Post drug                   | 1.2 (0.2)    | 1.3 (0.6)  | 1.0 (0.0)       | 1.0 (0.2)  |
| Home                        | 1.5 (0.7)    | 1.3 (0.8)  | 1.3 (0.9)       | 1.0 (0.1)  |

doi:10.1371/journal.pone.0005180.t001

pronounced after naltrexone administration, the effect of drug on withdrawal symptoms was not statistically significant. This marginal effect may have been suppressed by a small sample size. Even so, the two groups showed no differential response to naltrexone. It is interesting that the effects of naltrexone may be observed so long after administration. The delayed effect of naltrexone has been previously reported [49], and may be due to the extended half-life of the 6- $\beta$ -naltrexol metabolite [50,51]. It is unknown if naltrexone would have produced changes in pain processing if measured at a later time-point.

Four methodological issues limit our interpretation of our results. First, the small sample size may not have provided adequate power for all tests. Observed effect sizes (mean standard differences) for within-group naltrexone effects, however, were very small, ranging from 0.05 to 0.19. Post-hoc power analyses revealed that, with alpha of 0.05 and beta of 0.80, a minimum of 220 participants per group would be needed to detect a significant effect. Therefore, for most tests, the nonsignificant findings were likely not due to inadequate sample size. Second, we did not collect information on menstrual phase, even though sensitivity to experimental pain is known to vary with fluctuating sex hormones [52]. The effect of menstrual phase was likely minimized as sessions were conducted no more than 72 hours apart. Third, participants' medications may have affected results from some tests. Our use of within-person statistics, and exclusion of those taking opioid medications, mitigates the impact of medication use.

## References

- Yunus MB (1992) Towards a model of pathophysiology of fibromyalgia: aberrant central pain mechanisms with peripheral modulation. *J Rheumatol* 19: 846–850.
- Waylonis GW, Heck W (1992) Fibromyalgia syndrome. New associations. *Am J Phys Med Rehabil* 71: 343–348.
- Kaplan KH, Goldenberg DL, Galvin-Nadeau M (1993) The impact of a meditation-based stress reduction program on fibromyalgia. *Gen Hosp Psychiatry* 15: 284–289.
- Neumann L, Buskila D (2003) Epidemiology of fibromyalgia. *Curr Pain Headache Rep* 7: 362–368.
- White KP, Speechley M, Harth M, Ostbye T (1999) The London Fibromyalgia Epidemiology Study: the prevalence of fibromyalgia syndrome in London, Ontario. *J Rheumatol* 26: 1570–1576.
- Geenen R, Jacobs JW (2001) Fibromyalgia: diagnosis, pathogenesis, and treatment. *Curr Opin Anaesthesiol* 14: 533–539.
- Wassem R, McDonald M, Racine J (2002) Fibromyalgia: patient perspectives on symptoms, symptom management, and provider utilization. *Clin Nurse Spec* 16: 24–8; discussion 29–30.
- Robinson RL, Birnbaum HG, Morley MA, Sisitsky T, Greenberg PE, et al. (2003) Economic cost and epidemiological characteristics of patients with fibromyalgia claims. *J Rheumatol* 30: 1318–1325.
- Petzke F, Clauw DJ (2000) Sympathetic nervous system function in fibromyalgia. *Curr Rheumatol Rep* 2: 116–123.
- Kosek E, Ekholm J, Hansson P (1996) Sensory dysfunction in fibromyalgia patients with implications for pathogenic mechanisms. *Pain* 68: 375–383.
- Lautenbacher S, Rollman GB (1997) Possible deficiencies of pain modulation in fibromyalgia. *Clin J Pain* 13: 189–196.
- Laughlin TM, Larson AA, Wilcox GL (2001) Mechanisms of induction of persistent nociception by dynorphin. *J Pharmacol Exp Ther* 299: 6–11.
- Igelz R, Atkinson JH (1980) Pain and its modulation. Part 2. efferent mechanisms. *Neurosurgery* 6: 584–590.
- Vaeroy H, Helle R, Forre O, Käss E, Terenius L (1988) Cerebrospinal fluid levels of beta-endorphin in patients with fibromyalgia (fibrositis syndrome). *J Rheumatol* 15: 1804–1806.
- Yunus MB, Denko CW, Masi AT (1986) Serum beta-endorphin in primary fibromyalgia syndrome: a controlled study. *J Rheumatol* 13: 183–186.
- Hamaty D, Valentine JL, Howard R, Howard CW, Wakefield V, et al. (1989) The plasma endorphin, prostaglandin and catecholamine profile of patients with fibrositis treated with cyclobenzaprine and placebo: a 5-month study. *J Rheumatol Suppl* 19: 164–168.
- Panarai AE, Vecchiet J, Panzeri P, Meroni P, Scarone S, et al. (2002) Peripheral blood mononuclear cell beta-endorphin concentration is decreased in chronic fatigue syndrome and fibromyalgia but not in depression: preliminary report. *Clin J Pain* 18: 270–273.
- Harris RE, Clauw DJ, Scott DJ, McLean SA, Gracely RH, et al. (2007) Decreased central mu-opioid receptor availability in fibromyalgia. *J Neurosci* 27: 10000–10006.
- Bengtsson M, Bengtsson A, Jorfeldt L (1989) Diagnostic epidural opioid blockade in primary fibromyalgia at rest and during exercise. *Pain* 39: 171–180.
- Guieu R, Serratrice G, Pouget J (1994) Counter irritation test in primary fibromyalgia. *Clin Rheumatol* 13: 605–610.
- Price DD, Staud R, Robinson ME, Mauderli AP, Cannon R, et al. (2002) Enhanced temporal summation of second pain and its central modulation in fibromyalgia patients. *Pain* 99: 49–59.
- Julien N, Goffaux P, Arsenault P, Marchand S (2005) Widespread pain in fibromyalgia is related to a deficit of endogenous pain inhibition. *Pain* 114: 295–302.
- Burckhardt CS, Clark SR, Bennett RM (1991) The fibromyalgia impact questionnaire: development and validation. *J Rheumatol* 18: 728–733.
- Bennett R (2005) The Fibromyalgia Impact Questionnaire (FIQ): a review of its development, current version, operating characteristics and uses. *Clin Exp Rheumatol* 23: S154–62.
- Krusei ME, Borkardt JJ, Younger JW, Nash MR, Shaw D (2004) Perceived links between physical problems and stress may be clouded by dissociative processes. *J Trauma Dissociation* 5: 121–127.
- Derogatis LR, Lazarus L (1994) Scl-90r, brief symptom inventory, and matching clinical rating scales. In: Maruish ME, ed. *The use of psychological testing for treatment planning and outcome assessment*. Hillsdale, NJ: Lawrence Erlbaum. pp 217–248.
- Benham G (April 2004) The sensory sensitivity scale: sex and population differences.
- Wolfe F, Smythe HA, Yunus MB, Bennett RM, Bombardier C, et al. (1990) The American College of Rheumatology 1990 Criteria for the Classification of Fibromyalgia. Report of the Multicenter Criteria Committee. *Arthritis Rheum* 33: 160–172.
- Rollman GB, Lautenbacher S (2001) Sex differences in musculoskeletal pain. *Clin J Pain* 17: 20–24.
- Geisser ME, Gracely RH, Giesecke T, Petzke FW, Williams DA, et al. (2007) The association between experimental and clinical pain measures among persons with fibromyalgia and chronic fatigue syndrome. *Eur J Pain* 11: 202–207.
- Handelsman L, Cochrane KJ, Aronson MJ, Ness R, Rubinstein KJ, et al. (1987) Two new rating scales for opiate withdrawal. *Am J Drug Alcohol Abuse* 13: 293–308.
- Watson D, Clark LA, Tellegen A (1988) Development and validation of brief measures of positive and negative affect: the PANAS scales. *J Pers Soc Psychol* 54: 1063–1070.
- Crawford JR, Henry JD (2004) The positive and negative affect schedule (PANAS): construct validity, measurement properties and normative data in a large non-clinical sample. *Br J Clin Psychol* 43: 245–265.
- Malcolm R, O'Neil PM, Von JM, Dickerson PC (1987) Naltrexone and dysphoria: a double-blind placebo controlled trial. *Biol Psychiatry* 22: 710–716.
- Preston KL, Bigelow GE (1993) Differential naltrexone antagonism of hydromorphone and pentazocine effects in human volunteers. *J Pharmacol Exp Ther* 264: 813–823.

## Acknowledgments

We wish to thank Joseph Gutman, MD, and Chris Lyons, MS, RN, for their clinical supervision.

## Author Contributions

Conceived and designed the experiments: JWY AZ. Performed the experiments: JWY EC. Analyzed the data: JWY. Contributed reagents/materials/analysis tools: JWY. Wrote the paper: JWY AZ EC.

36. Meyer MC, Straughn AB, Lo MW, Schary WL, Whitney CC (1984) Bioequivalence, dose-proportionality, and pharmacokinetics of naltrexone after oral administration. *J Clin Psychiatry* 45: 15–19.
37. Ferrari A, Bertolotti M, Dell'Utri A, Avico U, Sternieri E (1998) Serum time course of naltrexone and 6 beta-naltrexol levels during long-term treatment in drug addicts. *Drug Alcohol Depend* 52: 211–220.
38. Sax DS, Kornetsky C, Kim A (1994) Lack of hepatotoxicity with naltrexone treatment. *J Clin Pharmacol* 34: 898–901.
39. Martin WR, Jasinski DR, Mansky PA (1973) Naltrexone, an antagonist for the treatment of heroin dependence. Effects in man. *Arch Gen Psychiatry* 28: 784–791.
40. Cook DB, O'Connor PJ, Ray CA (2000) Muscle pain perception and sympathetic nerve activity to exercise during opioid modulation. *Am J Physiol Regul Integr Comp Physiol* 279: R1565–73.
41. Hudson JL, Hudson MS, Pliner LF, Goldenberg DL, Pope HGJ (1985) Fibromyalgia and major affective disorder: a controlled phenomenology and family history study. *Am J Psychiatry* 142: 441–446.
42. Walker EA, Keegan D, Gardner G, Sullivan M, Katon WJ, et al. (1997) Psychosocial factors in fibromyalgia compared with rheumatoid arthritis: I. Psychiatric diagnoses and functional disability. *Psychosom Med* 59: 565–571.
43. Park DC, Glass JM, Minear M, Crofford LJ (2001) Cognitive function in fibromyalgia patients. *Arthritis Rheum* 44: 2125–2133.
44. Shaver JLF, Wilbur J, Robinson FP, Wang E, Buntin MS (2006) Women's health issues with fibromyalgia syndrome. *J Womens Health (Larchmt)* 15: 1035–1045.
45. Aaron LA, Buchwald D (2003) Chronic diffuse musculoskeletal pain, fibromyalgia and co-morbid unexplained clinical conditions. *Best Pract Res Clin Rheumatol* 17: 563–574.
46. Slotkoff AT, Radulovic DA, Clauw DJ (1997) The relationship between fibromyalgia and the multiple chemical sensitivity syndrome. *Scand J Rheumatol* 26: 364–367.
47. Bell IR, Baldwin CM, Russek LG, Schwartz GE, Hardin EE (1998) Early life stress, negative paternal relationships, and chemical intolerance in middle-aged women: support for a neural sensitization model. *J Womens Health* 7: 1135–1147.
48. Geisser ME, Strader Donnell C, Petzke F, Gracely RH, Clauw DJ, et al. (2008) Comorbid somatic symptoms and functional status in patients with fibromyalgia and chronic fatigue syndrome: sensory amplification as a common mechanism. *Psychosomatics* 49: 235–242.
49. Younger JW, Lawler-Row KA, Moe KA, Kratz AL, Keenum AJ (2006) Effects of naltrexone on repressive coping and disclosure of emotional material: a test of the opioid-peptide hypothesis of repression and hypertension. *Psychosom Med* 68: 734–741.
50. King AC, Volpicelli JR, Gunduz M, O'Brien CP, Kreek MJ (1997) Naltrexone biotransformation and incidence of subjective side effects: a preliminary study. *Alcohol Clin Exp Res* 21: 906–909.
51. McCaul ME, Wand GS, Rohde C, Lee SM (2000) Serum 6-beta-naltrexol levels are related to alcohol responses in heavy drinkers. *Alcohol Clin Exp Res* 24: 1385–1391.
52. Riley JL3, Robinson ME, Wise EA, Price DD (1999) A meta-analytic review of pain perception across the menstrual cycle. *Pain* 81: 225–235.
53. Lee MC, Wagner HN, Tanada S, Frost JJ, Bice AN, et al. (1988) Duration of occupancy of opiate receptors by naltrexone. *J Nucl Med* 29: 1207–1211.
54. Walsh SL, Sullivan JT, Preston KL, Garner JE, Bigelow GE (1996) Effects of naltrexone on response to intravenous cocaine, hydromorphone and their combination in humans. *J Pharmacol Exp Ther* 279: 524–538.
55. Schuh KJ, Walsh SL, Sützer ML (1999) Onset, magnitude and duration of opioid blockade produced by buprenorphine and naltrexone in humans. *Psychopharmacology (Berl)* 145: 162–174.
56. Baraniuk JN, Whalen G, Cunningham J, Clauw DJ (2004) Cerebrospinal fluid levels of opioid peptides in fibromyalgia and chronic low back pain. *BMC Musculoskelet Disord* 5: 48.
57. Anderberg UM, Liu Z, Berghlund L, Nyberg F (1998) Plasma levels on nociceptin in female fibromyalgia syndrome patients. *Z Rheumatol* 57 Suppl 2: 77–80.
58. Giovengo SL, Russell IJ, Larson AA (1999) Increased concentrations of nerve growth factor in cerebrospinal fluid of patients with fibromyalgia. *J Rheumatol* 26: 1564–1569.
59. Vaerøy H, Sakurada T, Førre O, Kåss E, Terenius L (1989) Modulation of pain in fibromyalgia (fibrositis syndrome): cerebrospinal fluid (CSF) investigation of pain related neuropeptides with special reference to calcitonin gene related peptide (CGRP). *J Rheumatol Suppl* 19: 94–97.
60. Vaerøy H, Nyberg F, Terenius L (1991) No evidence for endorphin deficiency in fibromyalgia following investigation of cerebrospinal fluid (CSF) dynorphin A and Met-enkephalin-Arg6-Phe7. *Pain* 46: 139–143.
